# Supplementary material for: Short stature homeobox 2 methylation as a potential noninvasive biomarker in bronchial aspirates for lung cancer diagnosis
Source: PubMed Central journal article supplement (PMC5617421; doi:10.18632/oncotarget.18056), 2017-05-22
Supplement: oncotarget-08-61253-s001.pdf [file oncotarget-08-61253-s001.pdf]

# Short stature homeobox 2 methylation as a potential noninvasive biomarker in bronchial aspirates for lung cancer diagnosis

## SUPPLEMENTARY MATERIALS

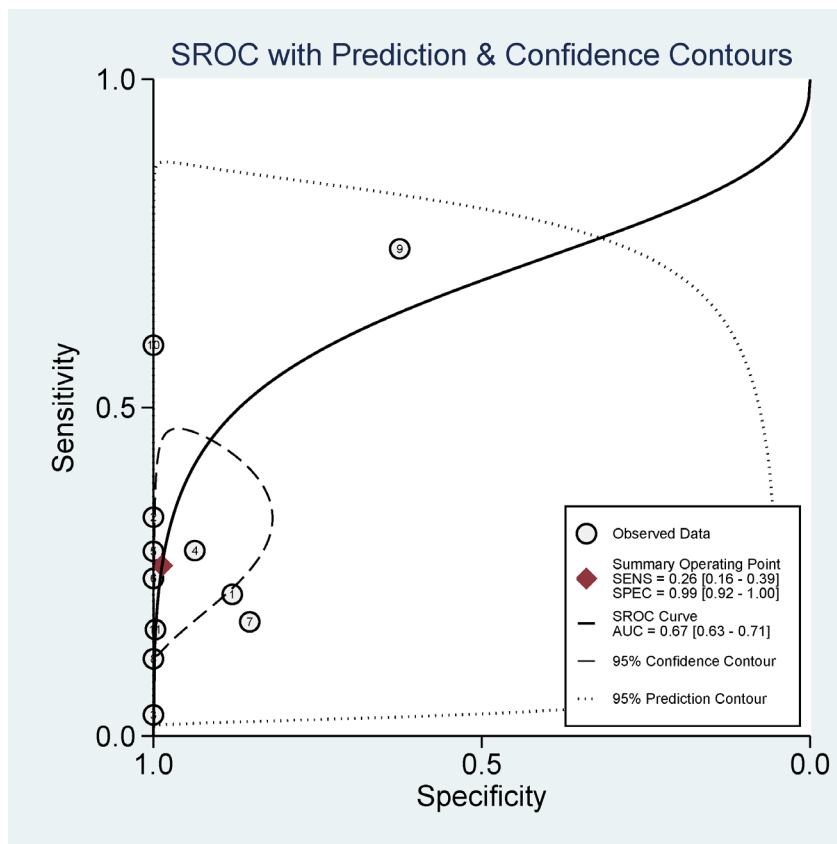

Supplementary Figure 1: Summary receiver operating characteristics (SROC) estimation for the potential diagnostic effect of the P16 methylation using bronchial aspirates in lung cancer vs. non-tumor controls.

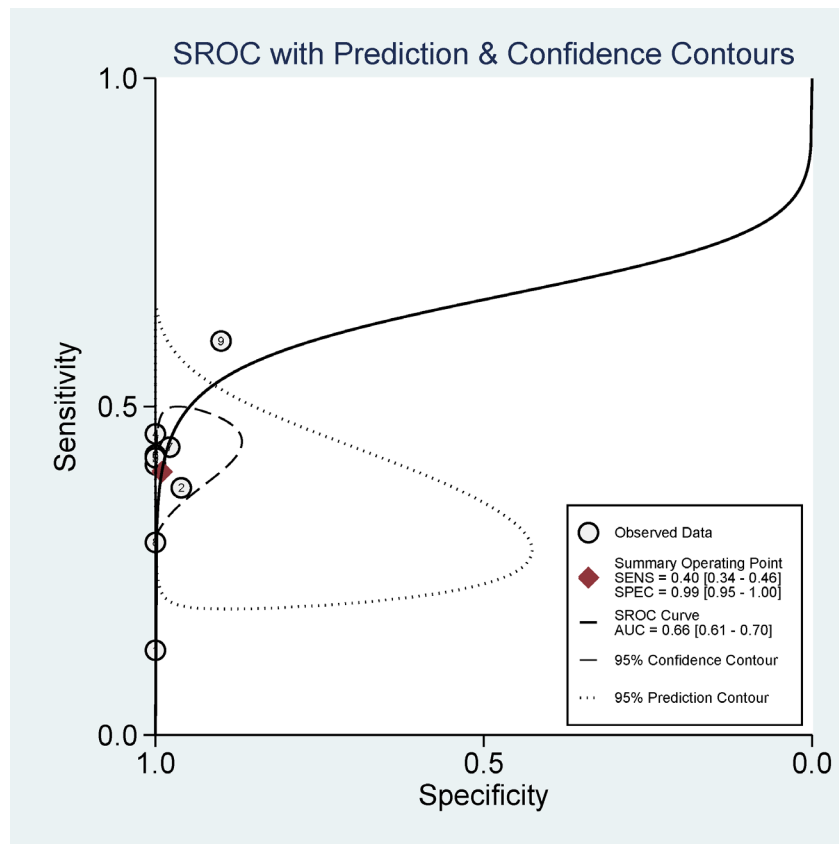

Supplementary Figure 2: Summary receiver operating characteristics (SROC) estimation for the potential diagnostic effect of the RASSF1A methylation using bronchial aspirates in lung cancer vs. non-tumor controls.

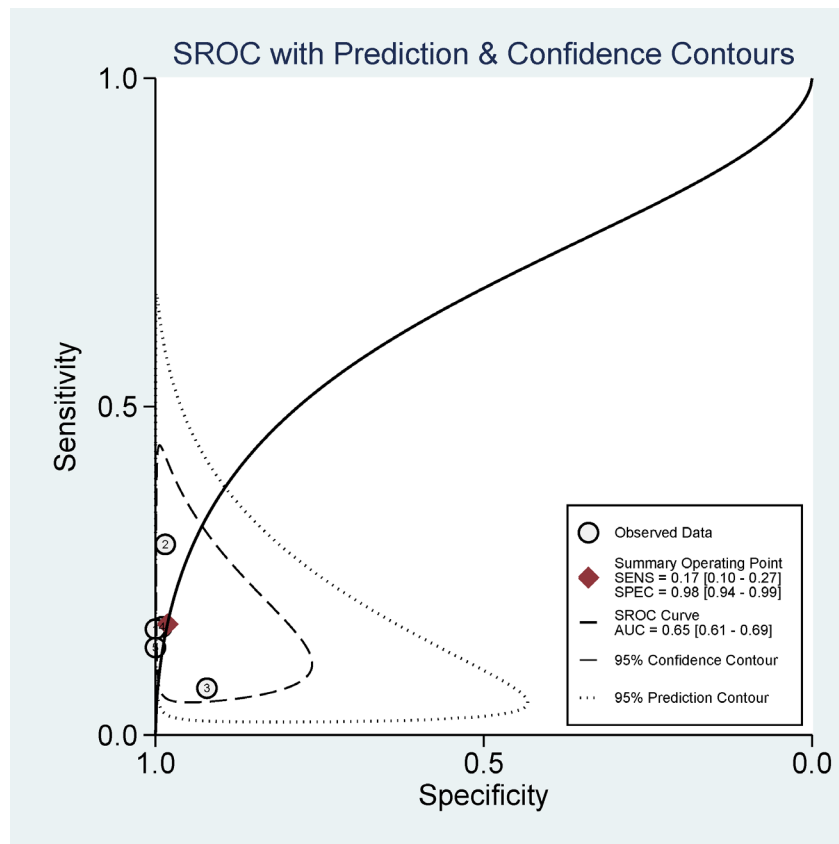

Supplementary Figure 3: Summary receiver operating characteristics (SROC) estimation for the potential diagnostic effect of the APC methylation using bronchial aspirates in lung cancer vs. non-tumor controls.

**Supplementary Table 1: General characteristics of the studies of the eligibility**

See Supplementary File 1

**Supplementary Table 2: The summary of the association in bronchial aspirates of patients with lung cancer vs. non-tumor controls**

| <i>Gene</i>    | <i>Studies</i> | <i>OR (95% CI)</i>    | <i>Heterogeneity (I<sup>2</sup>; P)</i> | <i>P value</i> | <i>Cancer</i> | <i>Controls</i> |
|----------------|----------------|-----------------------|-----------------------------------------|----------------|---------------|-----------------|
| <i>PI6</i>     | 11             | 8.15 (3.18 - 20.87)   | 62.2%; 0.003                            | < 0.001        | 840           | 800             |
| <i>RASSF1A</i> | 9              | 32.60 (19.21 - 55.32) | 0.0%; 0.536                             | < 0.001        | 980           | 733             |
| <i>APC</i>     | 5              | 11.88 (4.75 - 29.72)  | 36.1%; 0.181                            | < 0.001        | 360           | 273             |
| <i>SHOX2</i>   | 4              | 50.10 (30.30 - 82.84) | 0.0%; 0.525                             | < 0.001        | 493           | 415             |
| <i>RARB2</i>   | 3              | 5.39 (2.22 - 13.08)   | 63.2%; 0.099                            | < 0.001        | 189           | 176             |
| <i>FHIT</i>    | 2              | 1.23 (0.73 - 2.05)    | 0.0%; 0.931                             | 0.439          | 107           | 201             |
| <i>RARB</i>    | 2              | 4.13 (2.83 - 6.04)    | 0.0%; 0.903                             | < 0.001        | 418           | 449             |
| <i>MGMT</i>    | 2              | 5.84 (1.14 - 29.95)   | 0.0%; 0.920                             | 0.034          | 55            | 88              |
| <i>CDH13</i>   | 2              | 3.27 (0.15 - 71.57)   | 96.2%; < 0.001                          | 0.452          | 279           | 340             |
| <i>DAPK</i>    | 2              | 1.52 (0.69 - 3.32)    | 3.3%; 0.309                             | 0.299          | 218           | 290             |
| <i>GSTP1</i>   | 1              | 1.03 (0.04 - 27.35)   | NA; NA                                  | 0.985          | 31            | 10              |
| <i>CDH1</i>    | 1              | 15.32 (0.82 - 284.84) | NA; NA                                  | 0.067          | 31            | 10              |
| <i>SEMA3B</i>  | 1              | 0.64 (0.13 - 3.17)    | NA; NA                                  | 0.582          | 75            | 25              |
| <i>TERT</i>    | 1              | 12.34 (8.21 - 18.54)  | NA; NA                                  | < 0.001        | 333           | 322             |
| <i>WT1</i>     | 1              | 12.71 (7.54 - 21.44)  | NA; NA                                  | < 0.001        | 333           | 322             |
| <i>CYGB</i>    | 1              | 3.46 (1.93 - 6.21)    | NA; NA                                  | < 0.001        | 333           | 322             |
| <i>p73</i>     | 1              | 2.11 (1.12 - 3.96)    | NA; NA                                  | 0.02           | 194           | 213             |
| <i>TMEFF</i>   | 1              | 1.11 (0.51 - 2.38)    | NA; NA                                  | 0.798          | 194           | 213             |
| <i>HOXA9</i>   | 1              | 47.88 (2.60 - 882.37) | NA; NA                                  | 0.009          | 40            | 10              |
| <i>PCDHGB6</i> | 1              | 12.18 (1.41 - 105.48) | NA; NA                                  | 0.023          | 40            | 10              |

OR: odds ratios; 95% CI: 95% confidence interval.
